# Supplementary material for: Novel origin of lamin-derived cytoplasmic intermediate filaments in tardigrades
Source: eLife journal article supplement (doi:10.7554/elife.11117), 2016-02-03
Supplement: supp [file elife-11117-supp-v1.zip]

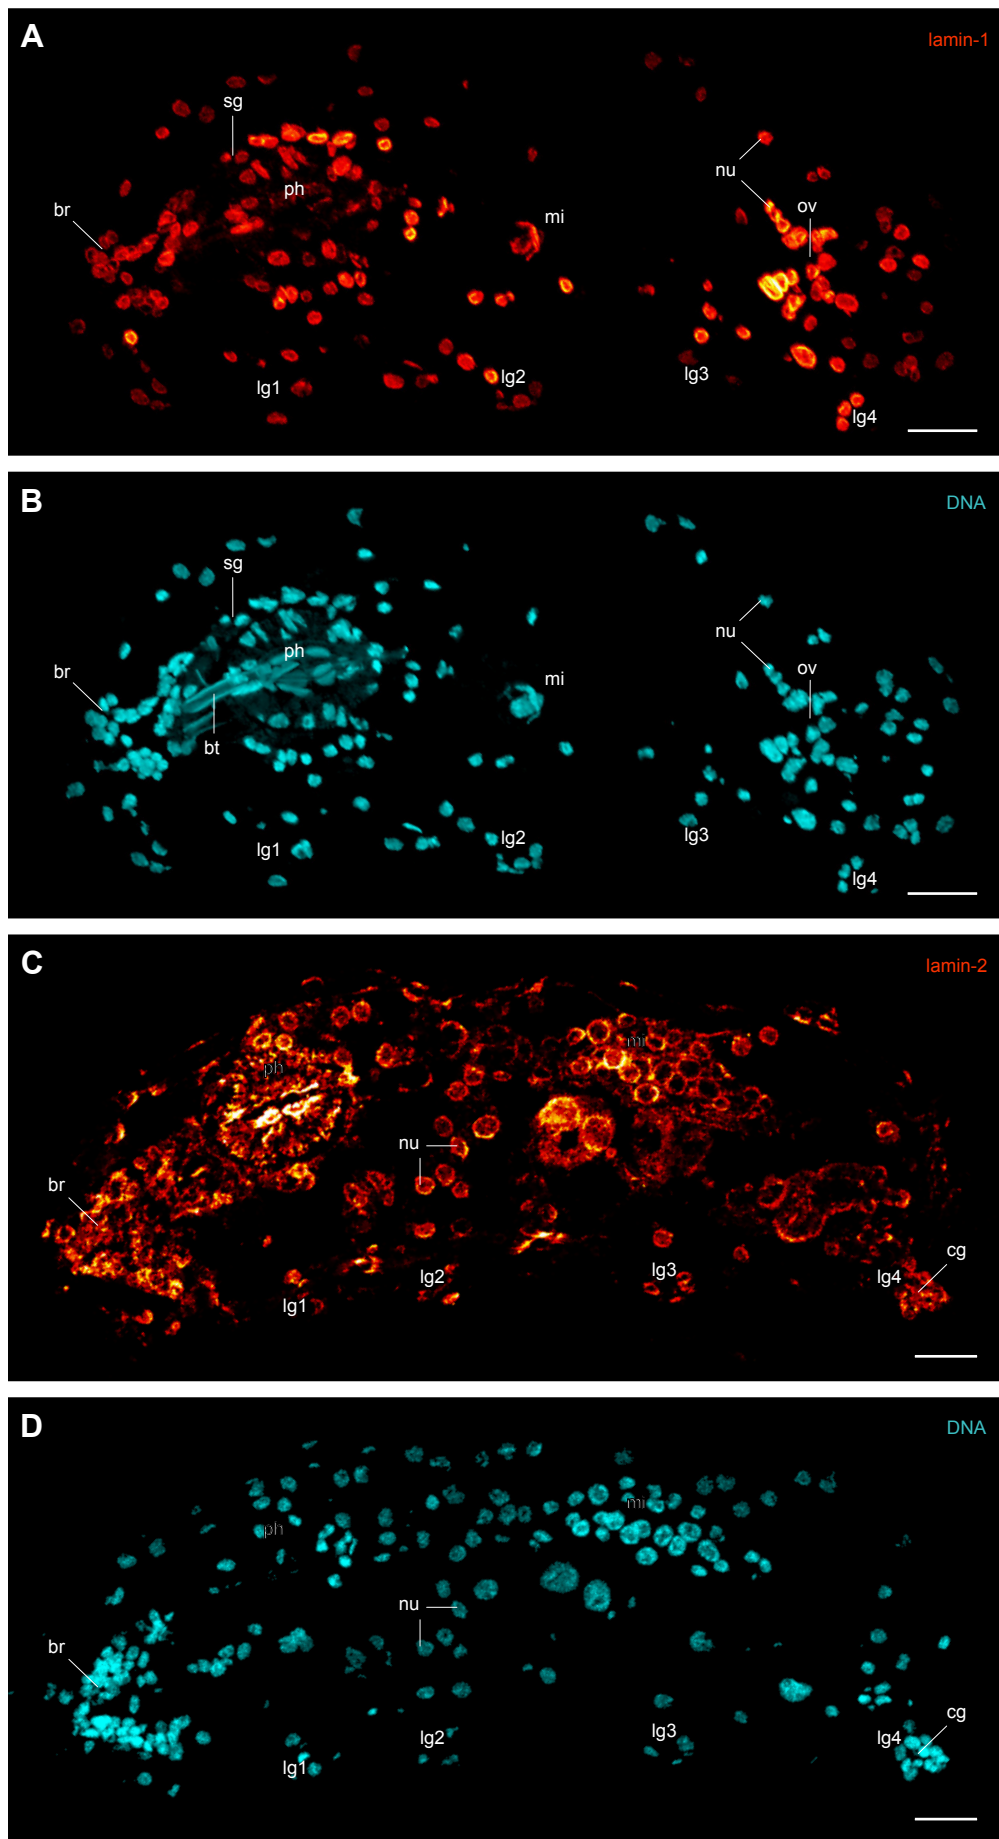

**Figure 4—figure supplement 2.** Immunofluorescence labelling of lamin-1 and lamin-2 in the tardigrade *Hypsibius dujardini*. Confocal laser-scanning micrographs. Sagittal sections of specimens. Anterior is left, dorsal is up. Note the presence of lamin-1 and lamin-2 inside all nuclei. Cuticular structures of the foregut are autofluorescent. (**A**, **B**) Double labelling of lamin-1 (glow-mode) and DNA (cyan) on a cryosection. (**C**, **D**) Double labelling of lamin-2 (glow-mode) and DNA (cyan) on a cryosection. br, position of the brain; bt, buccal tube; cg, claw gland; lg1–lg4, legs 1 to 4; mi, position of the midgut; nu, nuclei; ov, ovary; ph, pharynx; sg, salivary gland. Scale bars: (**A–D**) 10 µm.
