# Supplementary material for: Novel origin of lamin-derived cytoplasmic intermediate filaments in tardigrades
Source: eLife journal article supplement (doi:10.7554/elife.11117), 2016-02-03
Supplement: supp [file elife-11117-supp-v1.zip]

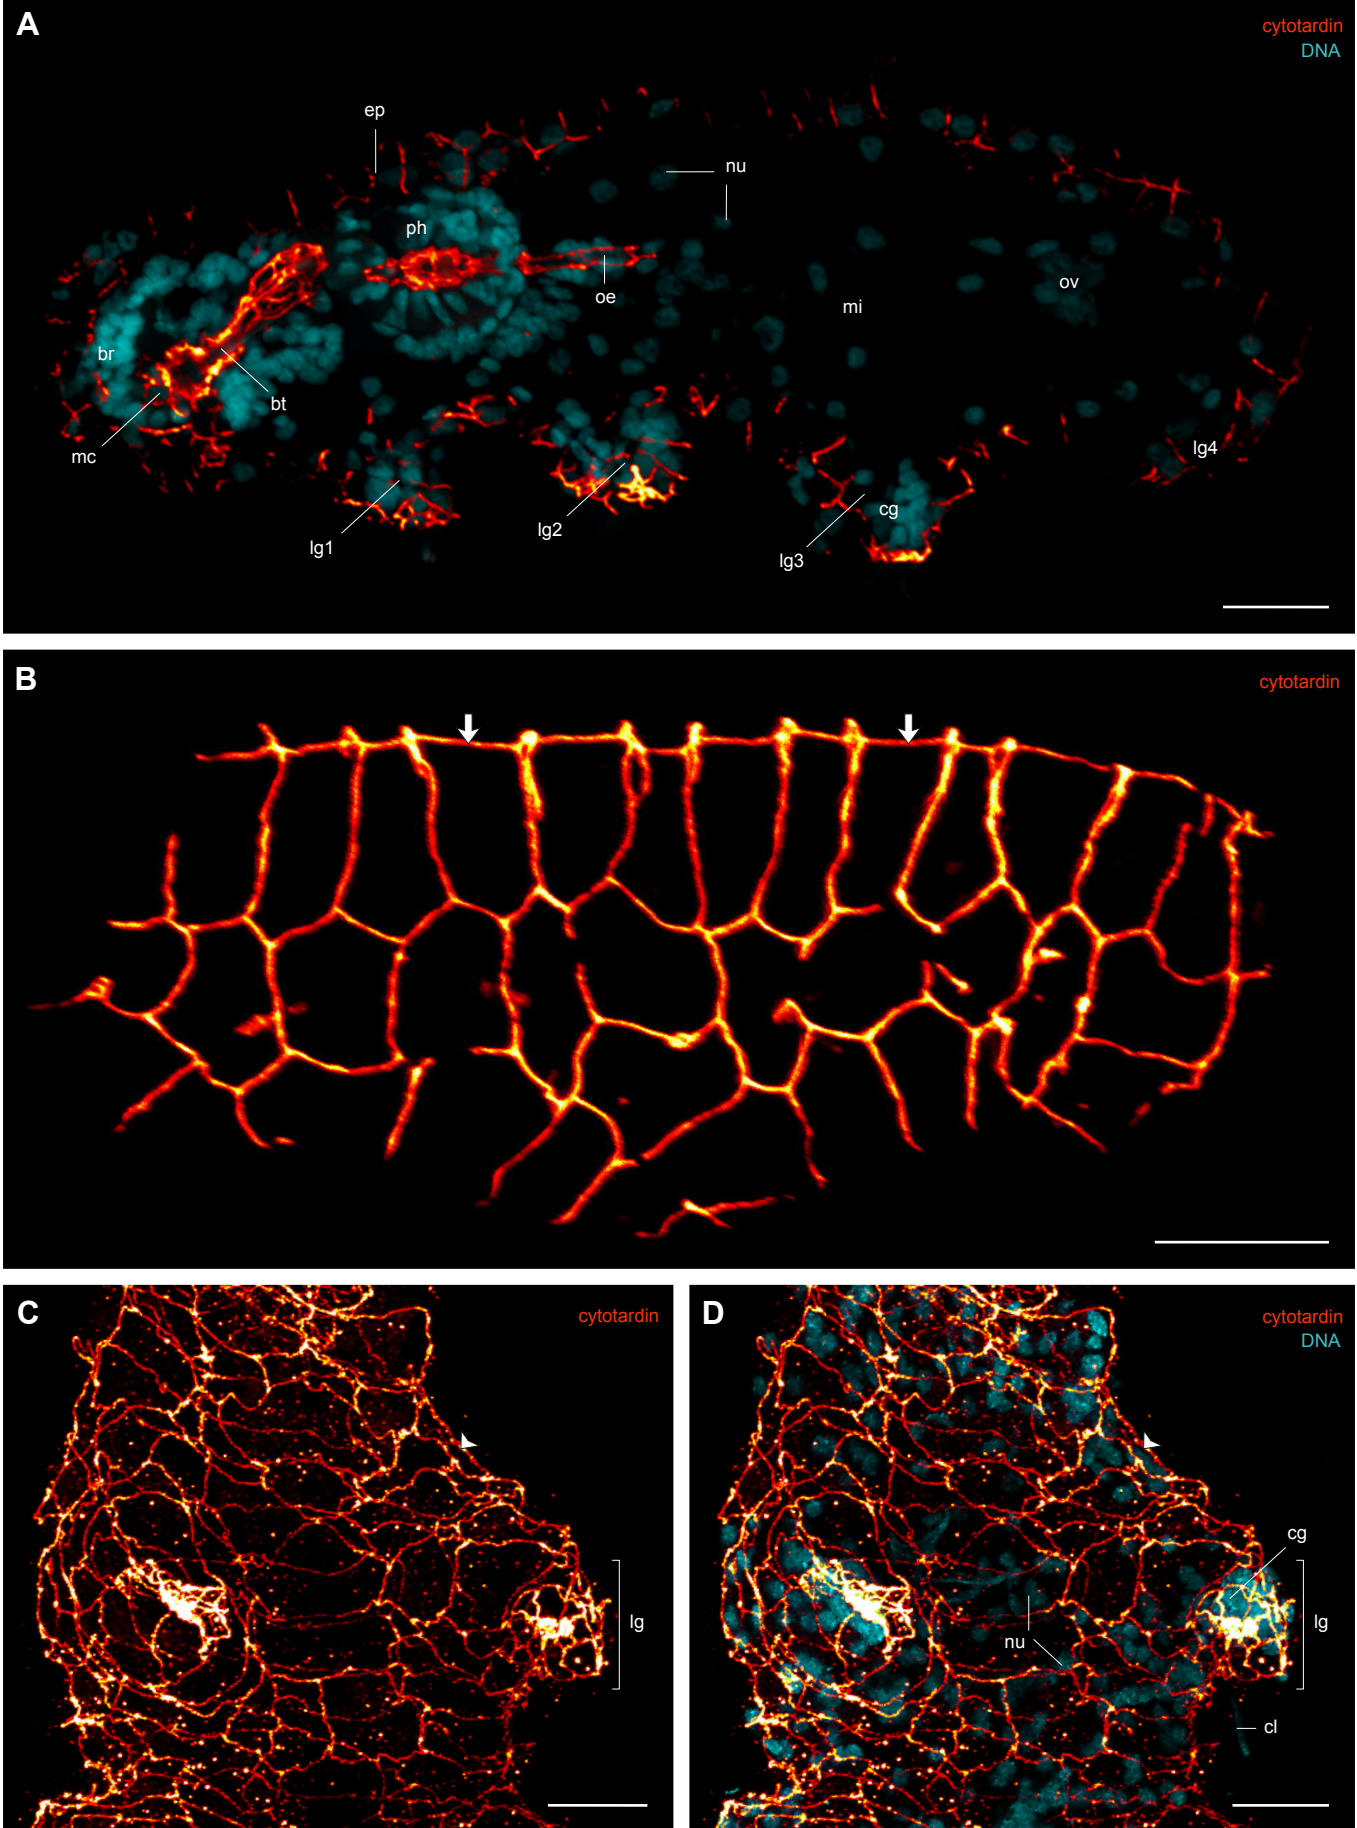

**Figure 4—figure supplement 3.** Immunofluorescence labelling of cytotardin in the tardigrade *Hypsibius dujardini* with focus on the epidermis. Confocal laser-scanning micrographs. **(A)** Double labelling of cytotardin (glow-mode) and DNA (cyan) on a cryosection. Sagittal section of a specimen. Anterior is left, dorsal is up. Note the exclusive presence of cytotardin filaments in the epidermis and tissues of the foregut. **(B)** Anti-cytotardin immunolabelling on a cryosection. Tangential section of dorsolateral body wall. Arrows point to the dorsal midline. **(C, D)** Double labelling of cytotardin (glow-mode) and DNA (cyan) on a whole-mount preparation of a contracted specimen. Detail of the third pair of legs in ventral view. Anterior is up. Note the apical position of cytotardin-filament belts in the epidermal cells (arrowheads) and their dense arrangement in the tips of each leg. br, brain; bt, buccal tube; cg, claw gland; cl, claw; ep, epidermis; lg, leg; lg1–lg4, legs 1 to 4; mc, mouth cone; mi, position of the midgut; nu, nuclei; oe, oesophagus; ov, ovary; ph, pharynx. Scale bars: **(A–D)** 10  $\mu$ m.
