# Supplementary material for: Novel origin of lamin-derived cytoplasmic intermediate filaments in tardigrades
Source: eLife journal article supplement (doi:10.7554/elife.11117), 2016-02-03
Supplement: supp [file elife-11117-supp-v1.zip]

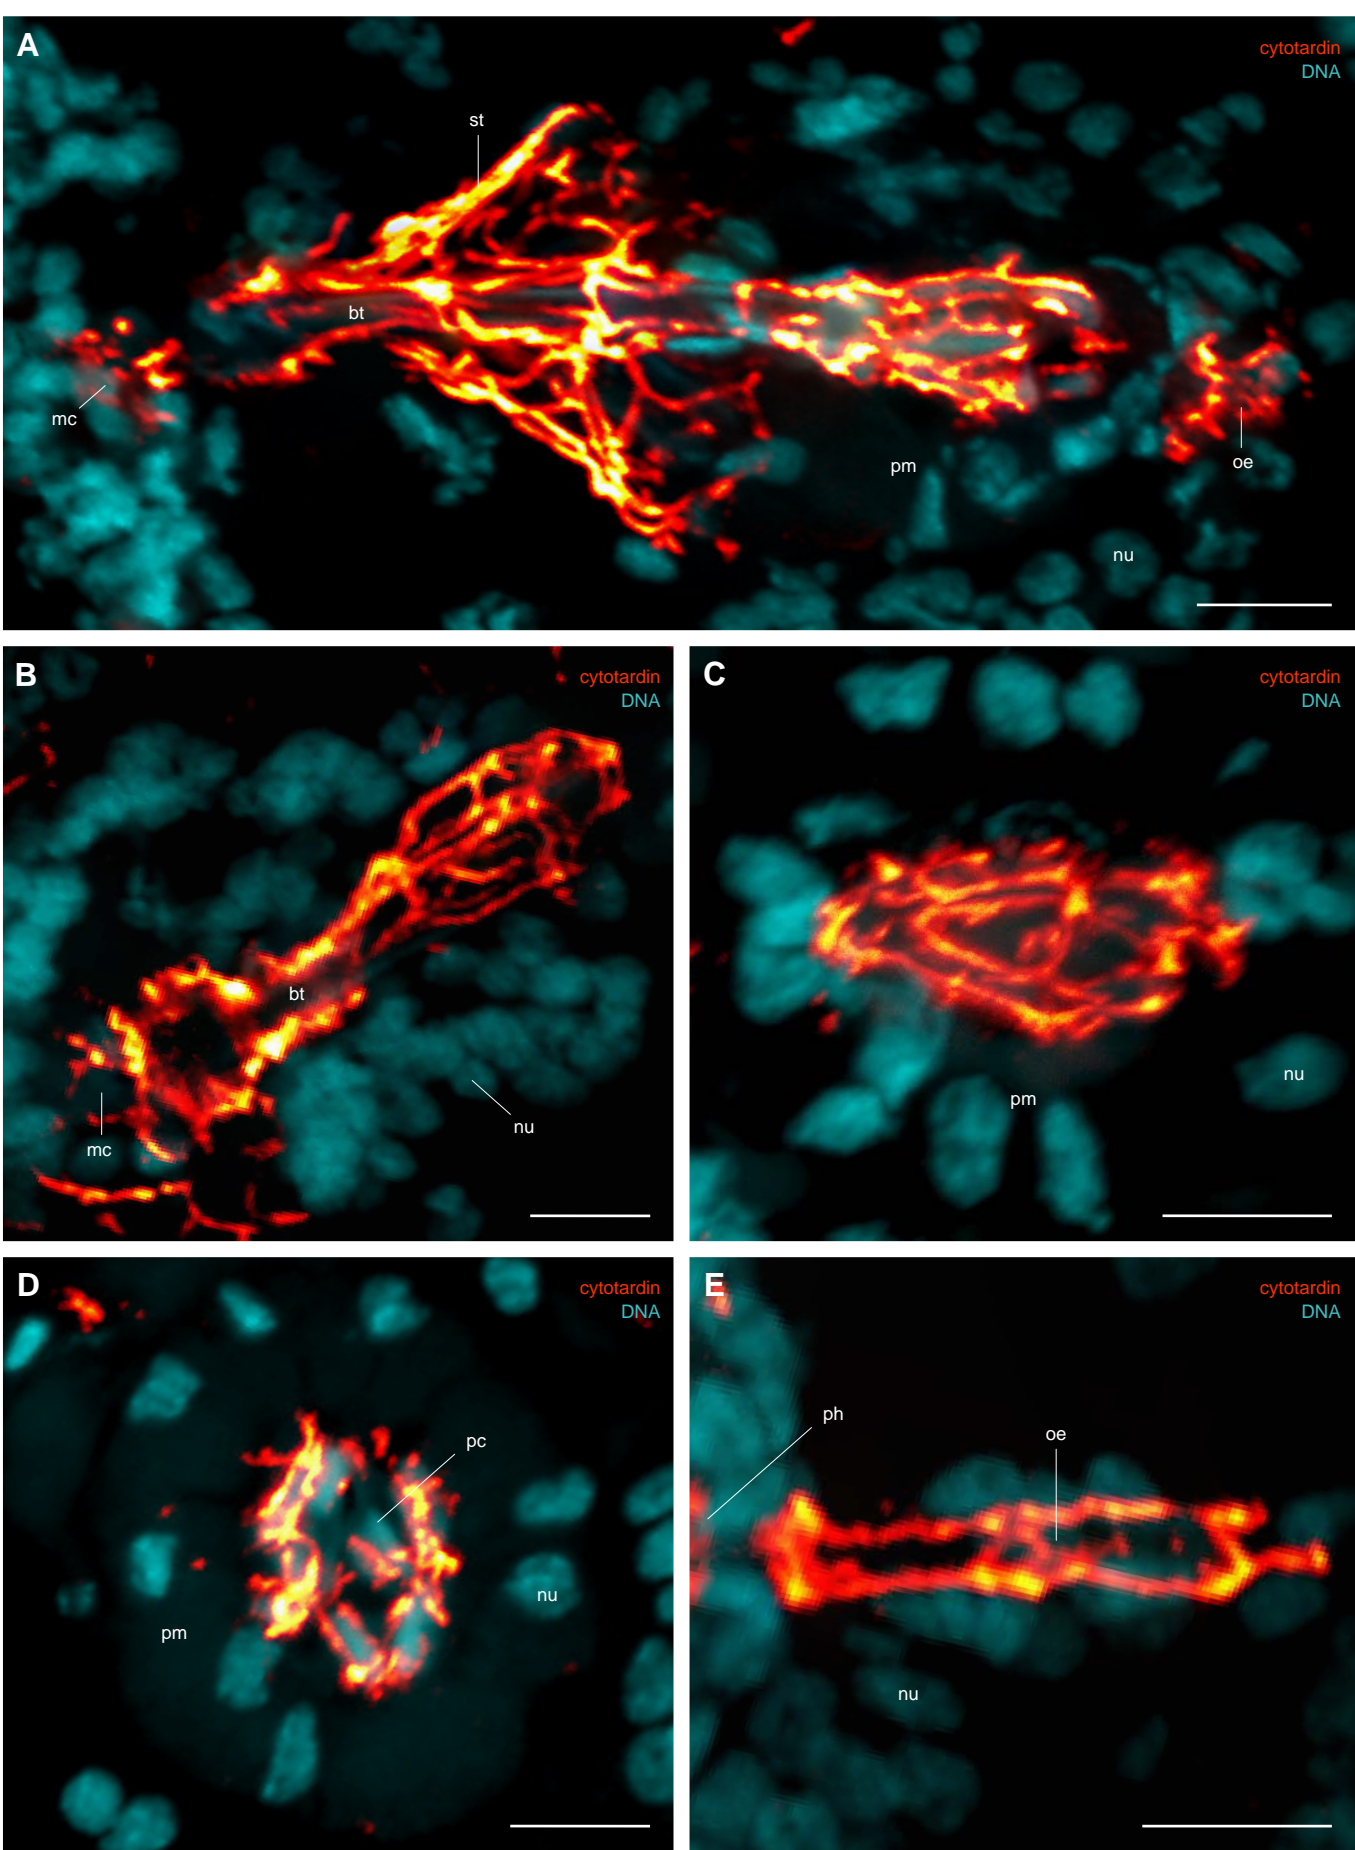

**Figure 6—figure supplement 1.** Immunofluorescence labelling of cytotardin in the tardigrade *Hypsibius dujardini* with focus on the foregut. Confocal laser-scanning micrographs. Double labelling of cytotardin (glow-mode) and DNA (cyan) on sagittal (**A–C, E**) and cross sections (**D**) of cryo-sectioned specimens. Cuticular structures of the foregut are autofluorescent. Anterior is left (**A–C, E**); dorsal is up (in **A–E**). (**A**) Overview of the foregut. Note the dense arrangement of cytotardin arrays in the epithelia of the foregut, especially those surrounding the stylets. (**B**) Detail of the buccal tube. (**C**) Detail of the pharynx. (**D**) Cross-section of the pharynx. (**E**) Detail of the oesophagus. bt, buccal tube; mc, mouth cone; nu, nucleus; oe, oesophagus; pc, placoid; ph, pharynx; pm, pharyngeal myoepithelium; st, epithelium surrounding the stylets. Scale bars: (**A–E**) 5  $\mu$ m.
