# Supplementary material for: Novel origin of lamin-derived cytoplasmic intermediate filaments in tardigrades
Source: eLife journal article supplement (doi:10.7554/elife.11117), 2016-02-03
Supplement: supp [file elife-11117-supp-v1.zip]

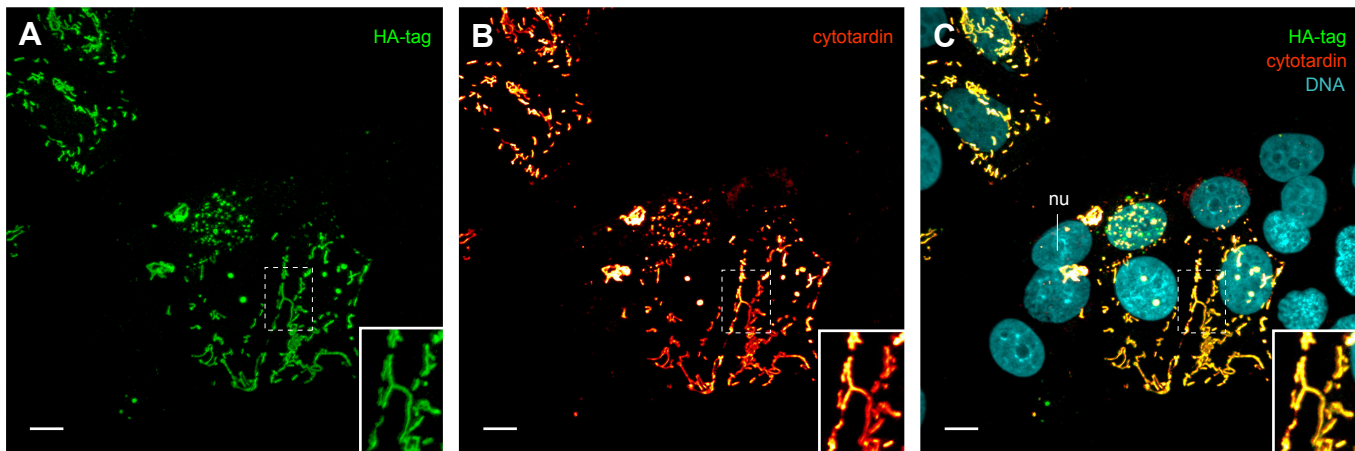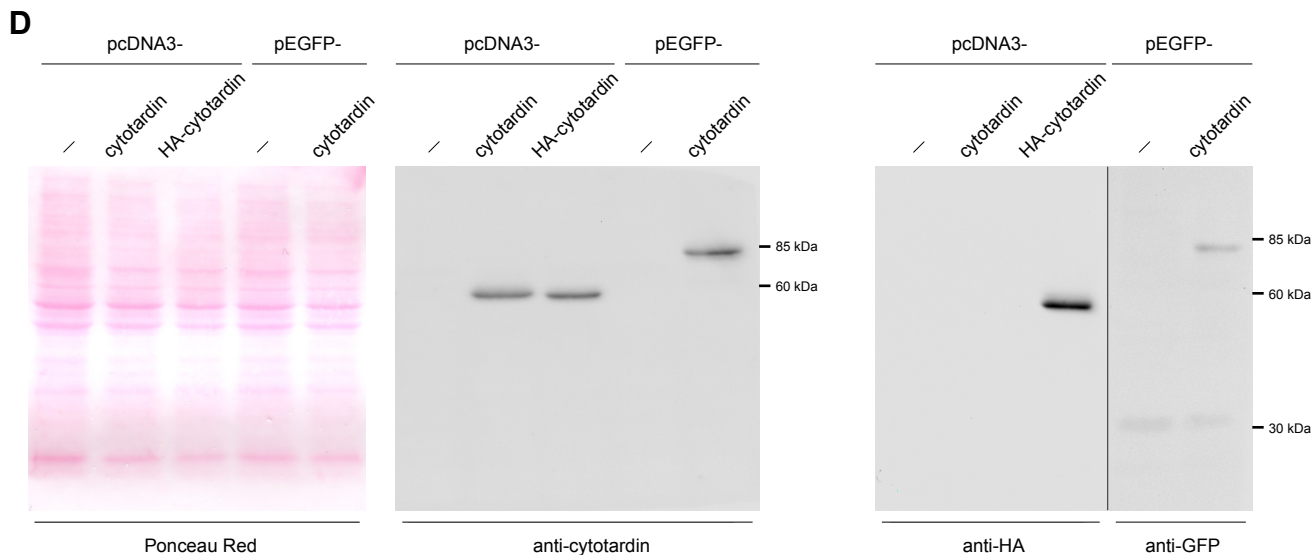

**Figure 5—figure supplement 1.** Characterization of cytotardin antiserum. (A–C) Triple labelling of cytotardin (glow-mode), HA-tag (green) and DNA (cyan) in MCF-7 cells transfected with pcDNA3-HA-cytotardin plasmids. Anti-cytotardin and anti-HA-tag staining show similar signals confirming the specificity of anti-cytotardin antibodies. HA-cytotardin is cytoplasmic and forms short filaments able to localize close to cell borders. (D) Western blot analysis of cytotardin in MCF-7 cells transfected with pcDNA3-cytotardin, pcDNA3-HA-cytotardin, pEGFP-cytotardin and the corresponding empty vectors. Left panel shows a Ponceau red-staining of the blotted cell extract as loading control. Anti-tag (right panel) compared to anti-cytotardin (middle panel) staining shows the expression of the exogenous protein and specificity of the antibodies for immunoblotting. nu, nucleus. Scale bars: (A–C) 10  $\mu$ m.
