# Supplementary material for: Novel origin of lamin-derived cytoplasmic intermediate filaments in tardigrades
Source: eLife journal article supplement (doi:10.7554/elife.11117), 2016-02-03
Supplement: supp [file elife-11117-supp-v1.zip]

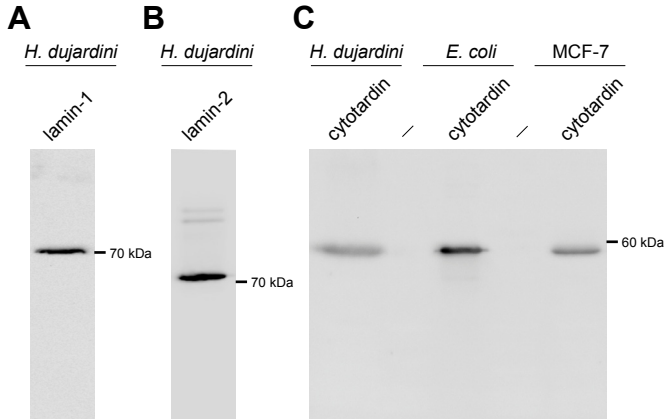

**Figure 4—figure supplement 1.** Western blots of lamin-1, lamin-2 and cytotardin antisera. **(A)** Western blot analysis of lamin-1 protein expression in *H. dujardini*. Anti-lamin-1 antibody stains a band of  $\approx 70$  kDa, as expected. **(B)** Western blot analysis of lamin-2 protein expression in *H. dujardini*. Anti-lamin-2 antibody stains a band of  $\approx 72$  kDa, as expected. **(C)** Western blot analysis of cytotardin protein expression in *H. dujardini*, transformed *E. coli* and transfected MCF-7 cells. Anti-cytotardin antibody stains a band of  $\approx 57$  kDa, as expected.
