# Supplementary material for: Novel origin of lamin-derived cytoplasmic intermediate filaments in tardigrades
Source: eLife journal article supplement (doi:10.7554/elife.11117), 2016-02-03
Supplement: supp [file elife-11117-supp-v1.zip]

**Figure 5—figure supplement 2.** Plasmids, primers, and restriction enzymes used for the cloning of tardigrade lamins and cytotardin.

| Plasmid              | Forward primer (5'→3')                                             | Reverse primer (5'→3')     | Restriction enzymes |
|----------------------|--------------------------------------------------------------------|----------------------------|---------------------|
| pGEM-T-lamin-1       | ATGGCCGAAAAAGCCGGAGAAG                                             | TCACAAGCCAAAGAATCCGAGG     | -                   |
| pGEM-T-lamin-2       | ATGTCCGCCCAAGTCAGCAAG                                              | TCACATGATCACGCAGTTCTT      | -                   |
| pET15b-cytotardin    | GCCATATGTACAGTTCAATGGCC                                            | GCCTCGAGTCATCACCAATCCGTTCT | NdeI/XhoI           |
| pcDNA3-cytotardin    | GCGCTAGCATGTACAGTTCAATG                                            | GCGGTACCTCACCAATCCGTTCT    | NheI/KpnI           |
| pcDNA3-HA-cytotardin | GCGCTAGCATGTATCCATATGATGTTCCAGA<br>TTATGCTGGTATGTACAGTTCAATGGCCTCT | GCGGTACCTCACCAATCCGTTCT    | NheI/KpnI           |
| pEGFP-C3-cytotardin  | GCCTCGAGATGTACAGTTCAATG                                            | GCGGTACCTCACCAATCCGTTCT    | XhoI/KpnI           |
