# Supplementary figures and images for: Novel origin of lamin-derived cytoplasmic intermediate filaments in tardigrades
Source: eLife journal article supplement (doi:10.7554/elife.11117), 2016-02-03

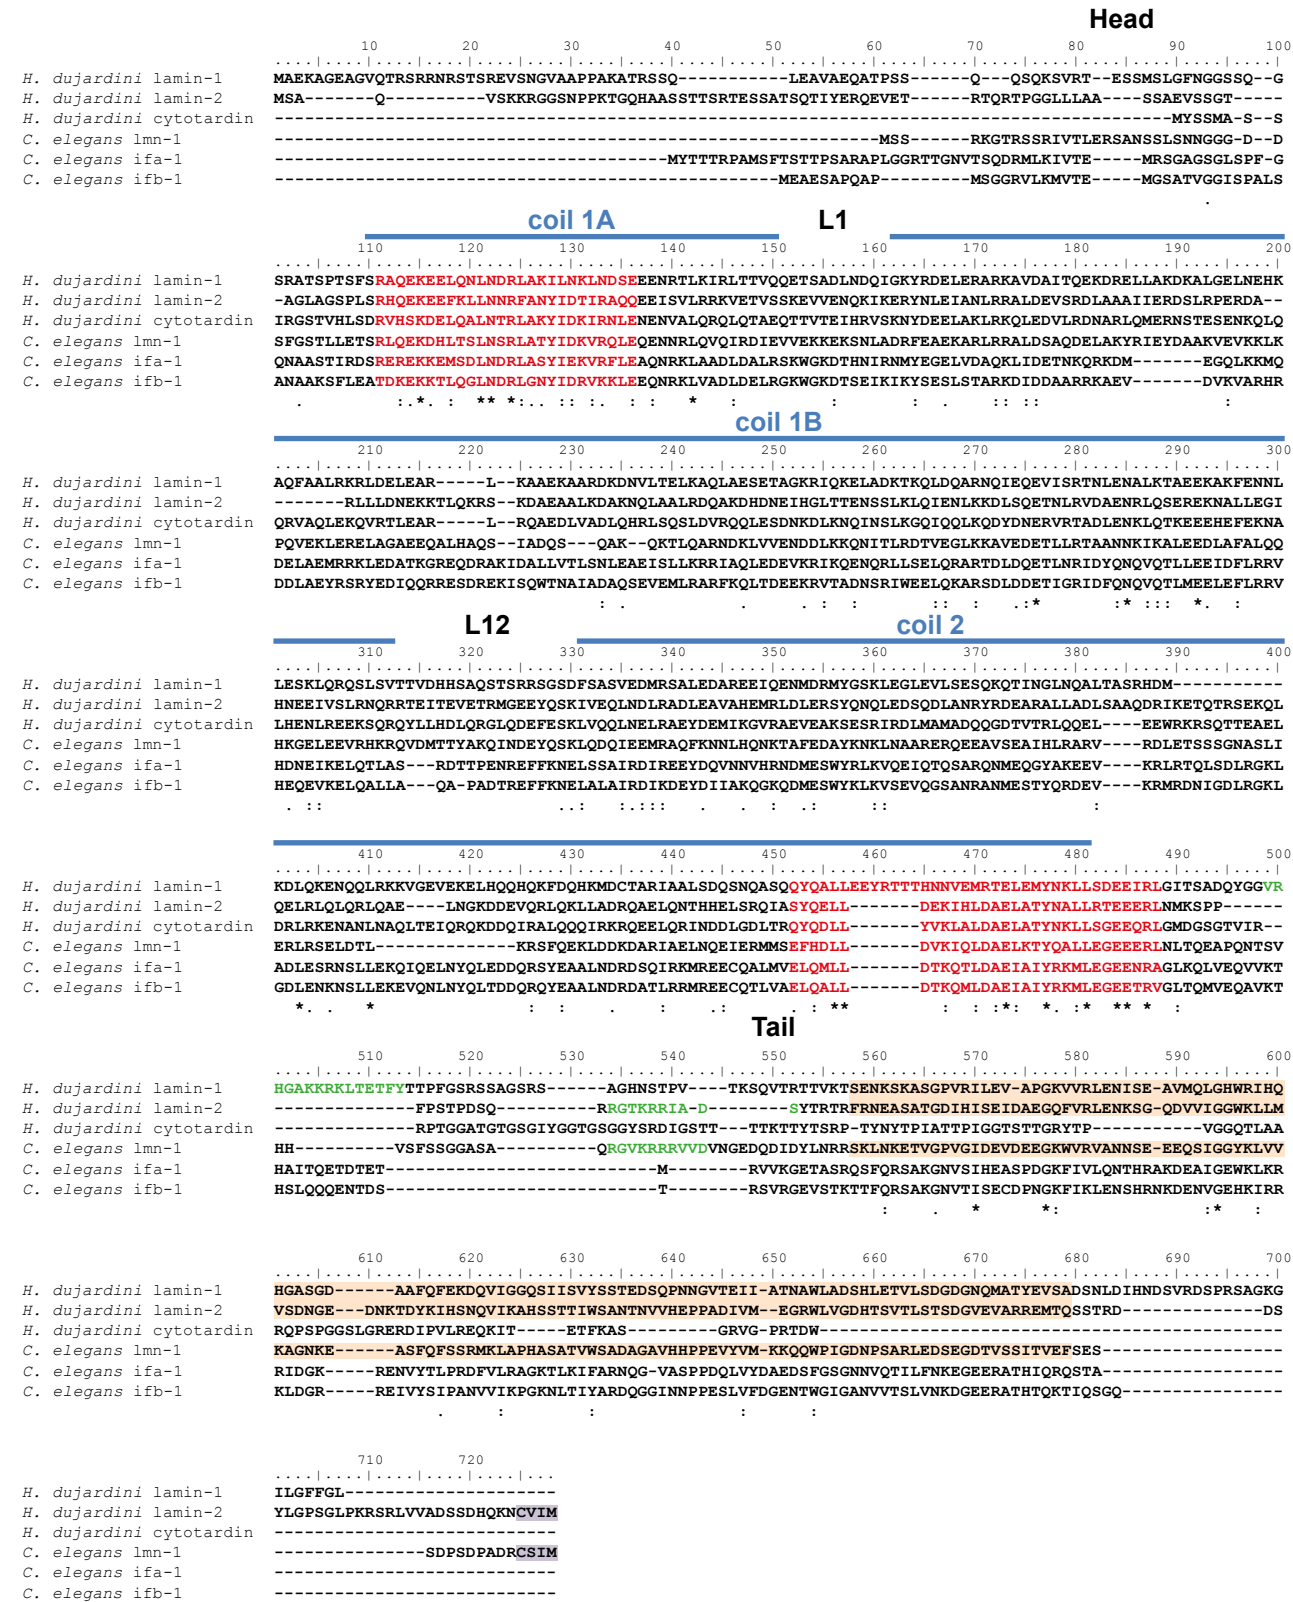

Supplement: supp [file elife-11117-supp-v1.zip]

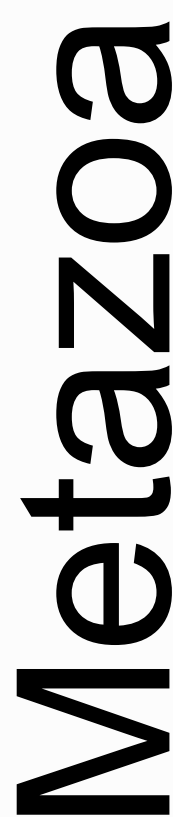

# bilaterian cytoplasmic intermediate filaments

Supplement: supp [file elife-11117-supp-v1.zip]
